# Supplementary material for: Diversity and Abundance of Potential Vectors of Rift Valley Fever Virus in the North Region of Cameroon
Source: PubMed Central journal article supplement (PMC7699143; doi:10.3390/insects11110814), 2020-11-19
Supplement: insects-11-00814-s001.pdf [file insects-11-00814-s001.pdf]

S1 Table: Summary of mosquito species captured: Diversity, distribution and abundance per locality.

| Mosquito genus                    | Mosquito species           | Localities (trap nights) |        |             |        |            |        |             |        | Total number of mosquitoes per species | Mean M/T/N |
|-----------------------------------|----------------------------|--------------------------|--------|-------------|--------|------------|--------|-------------|--------|----------------------------------------|------------|
|                                   |                            | Bokle (10)               |        | Garoua (13) |        | Lagdo (14) |        | Pitoea (15) |        |                                        |            |
|                                   |                            | No.                      | M/T/N  | No.         | M/T/N  | No.        | M/T/N  | No.         | M/T/N  |                                        |            |
| <i>Aedes</i>                      | <i>Ae aegypti</i>          | 12                       | 0.6    | 51          | 1.96   | 3          | 0.11   | 54          | 1.80   | 120                                    | 1.12       |
|                                   | <i>Ae albopictus</i>       | 4                        | 0.2    | 22          | 0.85   | 3          | 0.11   | 3           | 0.10   | 32                                     | 0.31       |
|                                   | <i>Ae circumluteolus</i>   | 0                        | 0      | 19          | 0.73   | 14         | 0.50   | 0           | 0.00   | 33                                     | 0.31       |
|                                   | <i>Ae dalzieli</i>         | 4                        | 0.2    | 25          | 0.96   | 19         | 0.68   | 10          | 0.33   | 58                                     | 0.54       |
|                                   | <i>Ae fowleri</i>          | 5                        | 0.25   | 22          | 0.85   | 36         | 1.29   | 31          | 1.03   | 94                                     | 0.85       |
|                                   | <i>Ae mcintoshi</i>        | 42                       | 2.1    | 0           | 0      | 0          | 0.00   |             | 0.00   | 42                                     | 0.53       |
|                                   | <i>Ae mucidus</i>          | 0                        | 0      | 0           | 0      | 5          | 0.18   | 15          | 0.50   | 20                                     | 0.17       |
|                                   | <i>Ae ochraceus</i>        | 6                        | 0.3    | 7           | 0.27   | 32         | 1.14   | 18          | 0.60   | 63                                     | 0.58       |
|                                   | <i>Ae vittatus</i>         | 35                       | 1.75   | 33          | 1.27   | 4          | 0.14   | 8           | 0.27   | 80                                     | 0.86       |
|                                   | TOTAL <i>Aedes</i>         | 108                      | 0.6    | 179         | 0.76   | 116        | 0.46   | 139         | 0.51   | 542                                    | 0.59       |
| <i>Anopheles</i>                  | <i>An. wellcomei</i>       | 0                        | 0      | 0           | 0      | 0          | 0.00   | 3           | 0.10   | 3                                      | 0.03       |
|                                   | <i>An coustani</i>         | 0                        | 0      | 0           | 0      | 27         | 0.96   | 3           | 0.10   | 30                                     | 0.27       |
|                                   | <i>An funestus</i>         | 12                       | 0.6    | 6           | 0.23   | 13         | 0.46   | 2           | 0.07   | 33                                     | 0.34       |
|                                   | <i>An gambiae</i>          | 7                        | 0.35   | 50          | 1.92   | 66         | 2.36   | 96          | 3.20   | 219                                    | 1.96       |
|                                   | <i>An maculipalpis</i>     | 30                       | 1.5    | 0           | 0      | 0          | 0.00   | 54          | 1.80   | 84                                     | 0.83       |
|                                   | <i>An nili</i>             | 3                        | 0.15   |             | 0      | 9          | 0.32   | 0           | 0.00   | 12                                     | 0.12       |
|                                   | <i>An pharoensis</i>       | 18                       | 0.9    | 5           | 0.19   | 63         | 2.25   | 29          | 0.97   | 115                                    | 1.08       |
|                                   | <i>An rufipes</i>          | 20                       | 1      | 17          | 0.65   | 26         | 0.93   | 0           | 0.00   | 63                                     | 0.65       |
|                                   | <i>An squamosus</i>        | 3                        | 0.15   | 0           | 0      | 0          | 0.00   | 84          | 2.80   | 87                                     | 0.74       |
|                                   | <i>An ziemanni</i>         | 3                        | 0.15   | 0           | 0      | 16         | 0.57   | 10          | 0.33   | 29                                     | 0.26       |
| <i>An spp.</i>                    | 6                          | 0.3                      | 10     | 0.38        | 13     | 0.46       | 10     | 0.33        | 39     | 0.37                                   |            |
| TOTAL <i>Anopheles</i>            | 102                        | 0.46                     | 88     | 0.31        | 233    | 0.76       | 291    | 0.88        | 714    | 0.60                                   |            |
| <i>Culex</i>                      | <i>Cx antennatus</i>       | 232                      | 11.6   | 950         | 36.54  | 1450       | 51.79  | 1400        | 46.67  | 4032                                   | 36.65      |
|                                   | <i>Cx bitaeniorhynchus</i> | 41                       | 2.05   | 34          | 1.31   | 0          | 0.00   | 19          | 0.63   | 94                                     | 1.00       |
|                                   | <i>Cx cinereus</i>         | 0                        | 0      | 0           | 0      | 0          | 0.00   | 60          | 2.00   | 60                                     | 0.50       |
|                                   | <i>Cx decens</i>           | 328                      | 16.4   | 138         | 5.31   | 4          | 0.14   | 212         | 7.07   | 682                                    | 7.23       |
|                                   | <i>Cx ethiopicus</i>       | 33                       | 1.65   | 5           | 0.19   | 0          | 0.00   | 18          | 0.60   | 56                                     | 0.61       |
|                                   | <i>Cx neavei</i>           | 107                      | 5.35   | 26          | 1      | 24         | 0.86   | 623         | 20.77  | 780                                    | 6.99       |
|                                   | <i>Cx perfuscus</i>        | 113                      | 5.65   | 141         | 5.42   | 44         | 1.57   | 217         | 7.23   | 515                                    | 4.97       |
|                                   | <i>Cx poicilipes</i>       | 6                        | 0.3    | 17          | 0.65   | 451        | 16.11  | 108         | 3.60   | 582                                    | 5.17       |
|                                   | <i>Cx quinquefasciatus</i> | 102                      | 5.1    | 3331        | 128.12 | 38         | 1.36   | 1673        | 55.77  | 5144                                   | 47.58      |
|                                   | <i>Cx univittatus</i>      | 161                      | 8.05   | 95          | 3.7    | 18         | 0.64   | 77          | 2.57   | 351                                    | 3.73       |
| <i>Cx spp.</i>                    | 6                          | 0.3                      | 0      | 0           | 0      | 0.00       | 0      | 0.00        | 6      | 0.08                                   |            |
| TOTAL <i>Culex</i>                | 1129                       | 5.13                     | 4737   | 16.56       | 2029   | 6.59       | 4407   | 13.35       | 12 302 | 10.41                                  |            |
| <i>Mansonia</i>                   | <i>Ma africana</i>         | 2359                     | 117.95 | 1091        | 42.0   | 3416       | 122.00 | 2654        | 88.47  | 9520                                   | 92.59      |
|                                   | <i>Ma uniformis</i>        | 671                      | 33.55  | 196         | 7.54   | 3483       | 124.39 | 420         | 14.00  | 4770                                   | 44.87      |
|                                   | <i>Ma spp.</i>             | 3                        | 0.15   |             | 0      | 0          | 0.00   |             | 0.00   | 3                                      | 0.04       |
| TOTAL <i>Mansonia</i>             | 3033                       | 50.55                    | 1287   | 16.5        | 6899   | 82.13      | 3074   | 34.16       | 14 293 | 45.83                                  |            |
| Number of mosquitoes per locality |                            | 4372                     | 14.19  | 6291        | 8.53   | 9277       | 22.48  | 7911        | 12.23  | 27 851                                 | 14.36      |

No: Number of mosquitoes caught; M/T/N: Average number of mosquitoes collected per trap night (mosquitoes/trap/night).
